# Supplementary material
Source: publisher site journal article supplement (https://zoologia.pensoft.net/article/19864/download/suppl/35/)
Supplement: Supplementary file 1

## Appendix S5: Tests for normality, homoscedasticity and homogeneity

Results from the tests for normality, homoscedasticity and homogeneity of the data. Results show that the data not attend the premises. Sample size of this study ( $n < 50$ ) not allow Multivariate Normality test.

### Box's M test

Box's M: -18805

F: 5.0752

df1; df2: 1190; 4740.8

p (equal var-covar): 0

Monte Carlo p: 0.996
